1 The bat influenza H17N10 can be neutralized by broadly-  
2 neutralizing monoclonal antibodies and its neuraminidase can  
3 facilitate viral egress.

4 George Carnell<sup>a,b,1</sup>, Efsthios S Giotis<sup>c,1</sup>, Keith Grehan<sup>a,d,1</sup>, Francesca Ferrara<sup>a</sup>,  
5 Stuart Mather<sup>a</sup>, Eleonora Molesti<sup>a</sup>, Simon Scott<sup>a</sup>, Antonello Pessi<sup>e</sup>, Krzysztof Lacek<sup>e,f</sup>,  
6 & Nigel Temperton<sup>a</sup>

7 <sup>a</sup> Viral Pseudotype Unit, Medway School of Pharmacy, University of Kent and University of Greenwich, Chatham, United Kingdom

8 <sup>b</sup> Laboratory of Viral Zoonotics, Department of Veterinary Medicine, University of Cambridge, United Kingdom

9 <sup>c</sup> Section of Virology, Faculty of Medicine, Imperial College London, St Mary's Campus, United Kingdom

10 <sup>d</sup> School of Molecular and Cellular Biology, University of Leeds, United Kingdom

11 <sup>e</sup> Ceinge Biotechnologie Avanzate S. C.R.L., Napoli, Italy

12 <sup>f</sup> The Laboratory of Virus Molecular Biology, University of Gdansk, 80-822 Gdansk, Poland

13 <sup>1</sup> Authors contributed equally

14  
15 Corresponding author: Nigel Temperton, [n.temperton@kent.ac.uk](mailto:n.temperton@kent.ac.uk), ORCID 0000-0002-7978-3815

16

17 Key words: Bat Influenza virus, broadly neutralizing antibody, Hemagglutinin, Neuraminidase

18 **Abstract**

19 The diversity of subtypes within the Influenza A virus genus has recently expanded with the  
20 identification of H17N10 and H18N11 from bats. In order to further study the tropism and zoonotic  
21 potential of these viruses, we have successfully produced lentiviral pseudotypes bearing both  
22 haemagglutinin H17 and neuraminidase N10. These pseudotypes were shown to be efficiently  
23 neutralized by the broadly-neutralizing monoclonal antibodies CR9114 and FI6. Our studies also  
24 confirm previous reports that H17 does not use sialic acid as its cellular receptor, as pseudotypes  
25 bearing the H17 envelope glycoprotein are released into the cell supernatant in the absence of NA.  
26 However, we demonstrate that N10 facilitates heterosubtypic (H5 and H7) influenza HA-bearing  
27 pseudotype release in the absence of another source of NA, significantly increasing luciferase  
28 pseudotype production titres. Despite this, N10 shows no activity in the enzyme-linked lectin assay  
29 used for traditional sialidases. These findings suggest that this protein plays an important role in viral  
30 egress, but is perhaps involved in further accessory roles in the bat influenza lifecycle that are yet to  
31 be discovered. Thus we show the lentiviral pseudotype system is a useful research tool, and  
32 amenable for investigation of bat influenza tropism, restriction and sero-epidemiology, without the  
33 constraints or safety issues with producing a replication-competent virus, to which the human  
34 population is naïve.

## 35 Significance statement

36 Influenza virus is responsible for mortality and morbidity across the globe; human populations are  
37 constantly at risk of newly emerging strains from the aquatic bird reservoir which harbors most of  
38 the subtypes of influenza A (H1-H16). Recently identified subtypes (H17N10, H18N11) from bats  
39 have broadened the reservoir from which potential pandemic strains of influenza can emerge. To  
40 evaluate the potential for these novel subtypes to cross over into human populations, their ability to  
41 establish an infection, in addition to the extent of cross-reactive immunity established by human  
42 seasonal strains needs to be investigated. This study highlights a novel platform for the study of the  
43 bat H17 and N10 envelope glycoproteins, using a lentiviral pseudotype system. Following the  
44 generation of this pseudotype it was employed in cell entry and microneutralization assays. These  
45 showed that two well-characterised monoclonal antibodies (mAb) which target avian and human  
46 influenza subtypes will also neutralize H17. Furthermore the data presented in this study show a  
47 novel aspect of the N10 glycoprotein in its ability to facilitate the budding of pseudotypes bearing  
48 different influenza HAs.

## 49 Introduction

50 Influenza A virus is the principal causative agent of influenza, which is a substantial burden to global  
51 economies and represents a significant public health risk worldwide (Ma et al. 2009; Reperant et al.  
52 2012). The first stages of the viral life cycle are mediated by the influenza glycoprotein  
53 hemagglutinin (HA), which is located in the lipid outer membrane of the virus. This protein mediates  
54 both the attachment of the influenza virus to the target cell and the fusion process which allows the  
55 virus to infect its host cell. Through its activity, HA is a key determinant of virus tropism (Dos Reis et  
56 al. 2011; Sahini et al. 2010). Furthermore, HA is a highly variable protein and its features are often  
57 used as methods for distinguishing different viral strains (Ebrahimi et al. 2014; Wilson and Cox  
58 1990).

59 While the association between influenza viruses and wild birds has long been established (Gelfond  
60 et al. 2009; Webster et al. 1992), the discovery of novel influenza-like viruses in New World bats  
61 (H17N10, H18N11) represents a possible challenge to the notion that avian species are its sole  
62 reservoir (Freidl et al. 2015; Sun et al. 2013; Tong et al. 2012, 2013). Recently, Egyptian *Rousettus*  
63 *aegyptiacus* bats have been reported to harbor a third bat influenza subtype (Kandeil et al. 2018). It  
64 is highly likely that further subtypes will be discovered in future years, warranting further research  
65 on existing strains of bat influenza.

66 The H17N10 and H18N11 subtypes of influenza A were discovered in bat species in Peru and  
67 Guatemala respectively. They are significantly diverged from other known influenza strains, in  
68 respect to all eight gene segments (Tong et al. 2012, 2013). The HA of these novel strains contain a  
69 number of apparently unique structural features and exhibit receptor-binding activities that differ  
70 from other influenza viruses (Sun et al. 2013). Notably, it has been shown that H17 and H18  
71 hemagglutinins do not bind to sialic acid receptors, and the true receptors are currently still  
72 unknown (Tong et al. 2013).

73 The neuraminidase (NA) of these viruses is also divergent from other known NAs, but the overall  
74 structure is preserved, despite differences in the active site (Juozapaitis et al. 2014; Ma et al. 2015).  
75 Lack of sialidase activity has been reported previously for these NAs (García-Sastre 2012; Li et al.  
76 2012; Tong et al. 2013; Zhu et al. 2012), suggesting they utilize a different substrate altogether. The  
77 combination of atypical HA binding profiles alongside a lack of NA activity suggests that this virus

78 functions differently to previously discovered influenza A subtypes, despite relative phylogenetic  
79 relatedness.

80 Although the receptor remains unknown, H17 and H18 sequences have been extensively analyzed  
81 and compared to those of other HA gene sequences, to investigate the potential for these bat  
82 viruses becoming zoonotic (Freidl et al. 2015; Mänz et al. 2013).

83 At present, the degree to which the H17N10 and H18N11 isolates are capable of infecting non-bat  
84 hosts is unknown, as attempts to isolate wildtype virus have not been successful. Sequence analysis  
85 indicates that there is significant potential for a spillover occurrence, but further research is required  
86 to assess the true potential of these viruses as pandemic threats (Freidl et al. 2015; Juozapaitis et al.  
87 2014).

88 To study the zoonotic potential of H17N10 and H18N11 viruses, attempts to integrate bat HAs into  
89 influenza A reverse genetics systems were made but none yielded infectious virus (Juozapaitis et al.  
90 2014; Zhou et al. 2014). More recently, progress has been achieved by Moreira et al. 2016 to this  
91 end, using a pseudotyped VSV platform.

92 Influenza pseudotyped viruses (PVs) are useful tools to study both viral entry mechanisms and the  
93 antibody response directed against the influenza HA and NA. Furthermore, when use of PVs is  
94 coupled with detailed sequence analysis and phylogenetic inference, they offer the potential to  
95 establish safe and effective assays to inform epidemiological and public health models of viral spread  
96 and risk. This is especially the case with later generation, single cycle lentiviral vectors, allowing  
97 experimentation on functional glycoproteins with the use of a reporter incorporated in the lentivirus  
98 genome.

99 In this study, we report generation of the first H17 and H17N10 pseudotyped lentiviruses, their use  
100 in virus neutralization assays using broadly neutralizing monoclonal antibodies (bnmAbs) and  
101 investigation into the debated substrate specificity of the putative N10 neuraminidase.

## 102 Results

### 103 Generation of H17- and N10- pseudotype viruses

104 Generation of H17- (A/little yellow shouldered bat/060/2010) and H5- (A/Vietnam/1194/2004)  
105 lentiviral PVs was achieved after transfection of HEK293T/17 cells with lentiviral pseudotype  
106 production plasmids (Figure 1), followed by transduction of target human U87 MG (glioblastoma)  
107 cells with PV supernatant. Generation of H17- PVs was only possible in the presence of HAT or  
108 TMPRSS2 proteases in HEK293T/17 cells (Figure 2), as has been seen with other subtypes of  
109 influenza (Bertram et al. 2010; Böttcher et al. 2006). Subsequent experiments were carried out using  
110 canine MDCK II and RIE1495 target cells which were previously reported to allow production of VSV-  
111 H17 (Moreira et al. 2016). In initial experiments, attempts were made to generate functional H17  
112 and H17N10 PV utilizing different protease-expressing plasmids to promote HA maturation. PV  
113 luciferase-based titres increased significantly when HAT-, TMPRSS2- and TMPRSS4- expression  
114 plasmids were used in the transfection mix when compared to controls, indicating activation of the  
115 bat HA and fusion competence. Other proteases tested (furin, KLK5, and TMPRSS3) did not yield  
116 significant titre increases. MDCK II and RIE1495 cells were notably transduced, whereas HEK293T/17  
117 cells were not. In the absence of co-transfected, protease-encoding plasmids, no significant PV titre  
118 was measurable (Figure 3).

## 119 **H17 entry of target cells is inhibited by broadly neutralizing monoclonal antibodies**

120 Treatment of RIE1495 cells with the acidifying agent ammonium chloride resulted in significantly  
121 lower levels of luciferase activity, demonstrating that H17 requires a low pH for membrane fusion  
122 similar to conventional influenza viruses, such as H5 (Figure 4). Several studies have demonstrated  
123 that the HA trimers of conventional influenza viruses must simultaneously coordinate their  
124 conformational changes to complete membrane fusion (Otterstrom et al. 2014). HA-binding broadly  
125 neutralising antibodies (bnmAbs) typically recognize loop regions surrounding the receptor binding  
126 site or conserved regions of the stem and their induced-inhibition is serotype-specific (Dreyfus et al.  
127 2013; Ekiert et al. 2009; Sui et al. 2009). In order to test whether cross reactive antibody responses  
128 would affect the H17 glycoprotein, several characterised bnmAbs were employed. Neutralization  
129 potency was measured as IC<sub>50</sub> (concentration or serum dilution required to neutralise 50% of input  
130 virus). Neutralization tests were conducted using both the permissible target cell lines identified  
131 above (MDCK II and RIE1495). The first bnmAb, CR9114, binds to a conserved epitope in the HA stalk  
132 of group 1 and 2 influenza A viruses, and has also been shown to protect against lethal influenza  
133 challenge in a mouse model against both lineages of influenza B (Dreyfus et al. 2012). The second,  
134 CR6261, has been shown to neutralize H1 and H5 subtypes (Friesen et al. 2010). The third, F16-nt,  
135 can neutralize H1 to H16 subtypes of influenza A. A fourth, F16-chol is a derivative of F16-nt,  
136 conjugated to cholesterol (Corti et al. 2011; Lacey et al. 2014). H17 is effectively neutralized by  
137 CR9114, at a concentration of 0.05 µg/ml. F16-nt and F16-chol also neutralize H17N10- PV, however,  
138 concentrations required exceed those of CR9114. In contrast, CR6261 was not able to neutralize  
139 H17 using the H17 PV assay (data not shown). Neutralization data is shown in Figure 5.

## 140 **N10 facilitates production of conventional H5 and H7 bearing PV.**

141 Pretreatment of target cells with sialidase, which removes cell surface sialic acids, did not affect the  
142 entry of H17 and H17N10 PVs, which supports previous studies that H17 does not bind sialic acids  
143 for infection (Maruyama et al. 2016), see Figure 6. N10-bearing PVs were titrated alongside H17 and  
144 H17N10 PV, in order to measure their ability to transduce cells. Results showed that N10 had no  
145 effect on H17 mediated viral entry and did not improve transduction when co-expressed with H17  
146 (data not shown). However, addition of N10 in the generation of H5 or H7 PVs (H5N10, H7N10)  
147 produced high titre PV in the absence of any other neuraminidase source (Figure 7), indicating that  
148 N10 is facilitating release of viral particles bearing sialic acid-binding glycoproteins. H5N10 luciferase  
149 titres were one log lower than parental H5 PV produced with exogenous neuraminidase, but two  
150 logs higher than N10, ΔEnvelope (ΔEnv) or cell only controls (Figure 7). Despite this, the same  
151 H5N10 PV preparation did not show any detectable NA activity when titrated using the enzyme  
152 linked lectin assay (ELLA), confirming previous reports that this protein is not a sialidase (García-  
153 Sastre 2012; Li et al. 2012; Tong et al. 2013; Zhu et al. 2012). Similarly, multiple different  
154 preparations of H17N10 or of N10 bearing PV produced negative results in ELLA (data not shown).

## 155 **Discussion**

156 We have successfully produced H17 and H17N10 bearing lentiviral pseudotypes, and shown that  
157 N10 is not required for H17 pseudotype budding, but that it can mediate release of a heterologous,  
158 sialic acid-binding HA bearing PVs. These bat influenza PVs were neutralized by cross-reactive  
159 bnmAbs, suggesting that the stalk region of the H17 glycoprotein retains conserved epitopes present  
160 in group 1 and 2 influenza HAs (Sun et al. 2013).

161 Of the target cell lines tested, H17 and H17N10 lentiviral PV were able to transduce U87 MG, MDCK  
162 II and RIE1495 cells to varying degrees when activated by proteolytic cleavage. Reports differ on the  
163 permissibility of the MDCK I type cells (Hoffmann et al. 2016; Moreira et al. 2016). Due to the nature  
164 of the pseudotype based microneutralisation (pMN) assay used in this study, the addition of cells in  
165 suspension into PV containing supernatant may allow infection/transduction to occur before cell

166 adhesion and thus by a different route than *in vivo*. This may explain our results in the context of  
167 Moriera and colleagues' findings that the bat influenza H18 VSV pseudotypes enter at the  
168 basolateral membrane and inefficiently infected confluent cell monolayers (Moreira et al. 2016).  
169 MDCK I and II differ in passage number (low and high, respectively), differences between them  
170 include the mucin-type transmembrane protein podoplanin, which is expressed only in MDCK I, and  
171 the Forssman glycosphingolipid, which is expressed only in MDCK II cells (Hansson et al. 1986;  
172 Zimmer et al. 1997). The susceptibility of MDCK cells to bat influenza viruses is unclear, and is partly  
173 compounded by the availability of various lineages with different characteristics (Dukes et al. 2011).  
174 The widespread use of MDCK cells in influenza research is at odds with a previous study that showed  
175 H17 failed to bind to MDCK cells (Sun et al. 2013). While the reasons for this are currently unclear, it  
176 has been hypothesized that the level of HA binding is below the threshold of detection for the assays  
177 used in this earlier study (Maruyama et al. 2016). Alternatively, only a subset of MDCK lineages may  
178 be susceptible to these viruses (Table 2). RIE1495 cells are morphologically similar to MDCK II cells  
179 and express the Forssman antigen, a possible factor in their susceptibility to H17 bearing PVs  
180 (Moreira et al. 2016). The cell tropism data reported in the Moreira study raise some interesting  
181 ideas concerning the H17 receptor, as only three out of eight bat cell lines were transduced by the  
182 H17-VSV pseudotypes, originating from two *Miniopterus* and one *Pteropus* species. This suggests  
183 that these viruses may be restricted to a particular set of closely related species belonging to the  
184 *Miniopteridae* and *Pteropidae* families, which are closely related to the *Phyllostomidae* family, from  
185 which the original H17 and H18 samples were isolated (Agnarsson et al. 2011; Tong et al. 2012).  
186 However, this raises further questions, as the cell lines derived from *Pteropus dasymallus*  
187 *yayeyamae* and *Rousettus leschenaultii* were not permissive, indicating a complex pattern of  
188 susceptibility of species to these new influenza viruses. Nevertheless, as these cell lines have only  
189 recently been isolated and immortalised (Maeda et al. 2008; Maruyama et al. 2014), detailed  
190 characterisation of their surface proteins and expressed proteases are not yet available, requiring  
191 additional research before conclusions can be drawn. Further investigation is required to determine  
192 the mechanisms involved for the transduction of canine cells but not HEK293T/17 cells, particularly  
193 relating to the expression of putative receptors on permissive cell lines.

194 Our results, contrary to previous studies, indicate that N10 is performing a similar function to other  
195 NAs in enabling release of new influenza virus particles, which indicate its ability to form VLPs rather  
196 than releasing H17 from its cellular receptor (Yondola et al. 2011). PVs bearing H5/H7 and N10  
197 envelope glycoproteins successfully budded from producer cells into the surrounding medium in the  
198 absence of a sialic acid cleaving neuraminidase, resulting in significantly increased titres when  
199 compared to the same glycoproteins generated without the addition of N10 (Figure 7). This increase  
200 in budding PV may be due to the action of N10 on an unknown substrate, or perhaps action of the  
201 protein itself in virus morphogenesis and budding (Barman et al. 2004; Yondola et al. 2011).  
202 Sialidase activity was however not detected using the enzyme-linked lectin assay, suggesting either a  
203 lack of sensitivity of this assay or another mechanism for the removal of surface sialic acids by N10  
204 (Juozapaitis et al. 2014; Sun et al. 2013; Wu et al. 2014). Similarly, PVs bearing solely the N10  
205 glycoprotein did not show sialidase activity via ELLA, or successfully transduce cells to give a  
206 significant luciferase reading. Further investigation is required on the role of the bat influenza  
207 neuraminidase in its lifecycle, the combination of the findings described in this article, with the fact  
208 that the N10 enzymatic structure remains conserved and NA-like, suggests that it is involved in  
209 accessory functions other than simply aiding in viral egress. Our results highlight the distinct  
210 difference between bat and traditional influenza A viruses where a delicate balance is in place  
211 between HA and NA. It may be the case that such a balance exists between bat HA and NAs which  
212 will be made clear once the substrate(s) of the bat NA is discovered.

213 In a previous study, it was demonstrated that the TMPRSS2 protease was capable of inducing HA  
214 maturation of H17 through cleavage from HA0 to HA1 and HA2 (Hoffmann et al. 2016). In our study,  
215 we demonstrated that this maturation can also be facilitated by TMPRSS4 and HAT. This is of  
216 particular interest as the expression of specific proteases is a known limiting factor in viral tropism  
217 for a number of different viruses (Böttcher-Friebertshäuser et al. 2010; Ferrara et al. 2012; Millet  
218 and Whittaker 2015). This, coupled with the observed susceptibility of a canine-derived cell line to  
219 the H17 PV, will need to be factored into future analysis of the potential for zoonotic spillover from  
220 bat origin influenza viruses.

221 The fact that bnmAbs were able to neutralize the virus particles via the H17 hemagglutinin, and their  
222 requirement for proteolytic activation, reinforces that we have only scratched the surface in terms  
223 of their characterization. Further exploration is required to establish whether these viruses are  
224 endogenous or capable of forming infectious particles *in vivo*. Research has revealed that all eight  
225 segments of the genome encode functional proteins (Juozapaitis et al. 2014; Moreira et al. 2016; Wu  
226 et al. 2014; Zhu et al. 2012), despite the inability to isolate wildtype virus to date. Nevertheless, the  
227 development of tools, such as those described here, which can be used in H17 receptor  
228 identification studies may ultimately aid discovery of wildtype virus samples from the bat reservoir.

## 229 **Methods**

### 230 **Plasmids:**

231 The H17 HA and N10 NA genes from A/little yellow shouldered bat/Guatamala/060/2010 were  
232 synthesised commercially by Genscript (Genscript, USA) and subcloned into vector pl.18 (Cox et al.  
233 2002). Lentiviral packaging plasmids p8.91 (Zufferey et al. 1997) and pCSFLW (Demaison et al. 2002)  
234 containing a firefly luciferase reporter were used to produce PV. Protease encoding plasmids  
235 pHCMV-Tag3 (TMPRSS4-myc) and pcDNA3.1-hTMPRSS3 were kindly provided by Prof. Stefan  
236 Pöhlmann, Infection Biology Unit, German Primate Center, Germany. pCAGGS-TMPRSS2 and  
237 pCAGGS-HAT were kindly provided by Eva Böttcher-Friebertshäuser, Philipps University of Marburg,  
238 Germany. The plasmid bearing the Vesicular stomatitis virus envelope protein (VSV-G), pMD.G was  
239 obtained from Dr Yasu Takeuchi, University College London, United Kingdom. All the plasmids that  
240 were used in this study are listed in Table 3.

### 241 **Cell lines:**

242 Multiple cell lines were used for titration of PV containing supernatants. HEK293T/17 cells were  
243 kindly provided by Dr Edward Wright (University of Westminster, UK). MDCK II and RIE1495 were  
244 kindly provided by Dr. Gert Zimmer (Institute of Virology and Immunology, Switzerland). U-87 cells  
245 were provided by Dr Simon Scott (University of Kent, UK). Madin-Darby Canine Kidney (MDCK) cells  
246 were kindly provided by Prof. Sarah Gilbert (Jenner Institute, University of Oxford, UK). All cells were  
247 cultured in Dulbecco's modified eagle medium supplemented with 10% fetal bovine serum.

### 248 **Antibodies:**

249 mAbs CR9114 and CR6261 were produced by Crucell (Janssen Vaccines AG, Bern, Switzerland). FI6-nt  
250 and cholesterol conjugated FI6 (FI6-Chol) were produced by Alfredo Pesci and Krzysztof Lacey from  
251 sequence information derived from Corti et al. 2011.

### 252 **Production and quantification of H17N10 and H17 bearing lentiviral pseudotypes:**

253 PV were produced as described previously (Ferrara et al. 2012; Temperton et al. 2007) and as shown  
254 in Figure 1. Briefly, transfection of HEK293T/17 cells was performed using a variety of combinations

255 of plasmids pl.18-H17, pl.18-N10, p8.91 and pCSFLW using polyethylenimine transfection reagent  
256 (Sigma Aldrich, UK). Protease-encoding expression plasmids were also included (Table 3). Medium  
257 was replaced 12h post-transfection. Supernatants were harvested 48h post-transfection and passed  
258 through a 0.45µm filter (Millipore, UK). PV-containing supernatants were titrated using the firefly  
259 luciferase Bright-Glo™ system (Promega, UK). Serial dilution of 100µl of PV-containing supernatant  
260 was performed across a white flat bottom 96-well Nunclon® plate (Thermo Fisher Scientific, UK).  
261 Subsequently, approximately  $1 \times 10^4$  cells per well were added per well in 50µl of medium, plates  
262 were incubated in a humidified incubator at 37°C 5% CO<sub>2</sub> for 48h, after which 50µl of Bright-Glo™  
263 substrate was added and luciferase reading recorded in relative luminescence units (RLU) after a 5  
264 minute incubation period. Further sets of N10-bearing PV were produced by transfection of  
265 HEK293T/17 cells with 500ng p8.91, 750ng pCSFLW and various amounts of pl.18-N10 plasmid.  
266 Medium was replenished after 12h; PV containing supernatants were collected 72h later and passed  
267 through a 0.45µm filter. Transfections were carried out in 6-well Nunclon® plates (Thermo Fisher  
268 Scientific, UK).

269 GFP-expressing pseudotypes were produced by substituting the pCSFLW firefly luciferase lentiviral  
270 vector mentioned previously with the GFP expressing vector pCSGW. PV-containing supernatants  
271 were titrated down clear 96-well Nunclon® plates (Thermo Fisher Scientific, UK) with the addition of  
272  $1 \times 10^4$  cells per well. Plates were incubated for 72h and visualized by Nikon Eclipse 50i  
273 epifluorescence microscope with a charge-coupled QICAM Fast 1394 camera (QImaging) at x200  
274 magnification.

#### 275 **Screening of cell lines**

276 Two-fold serial dilutions of PV-containing supernatant were performed as previously described using  
277 white 96-well Nunclon® plates (Thermo Fisher Scientific, UK). Subsequently, approximately  $1 \times 10^4$  of  
278 each cell line was added in 50µl of medium per well. Plates were incubated in a humidified incubator  
279 at 37°C and 5% CO<sub>2</sub> for 48h, after which 50µl of Bright-Glo™ substrate was added and luciferase  
280 reading recorded in relative luminescence units (RLU), following a 5 minute incubation period.  
281 Control wells were used to measure cell populations for each cell line.

#### 282 **Pseudotype based microneutralization assay (pMN) using H17N10 and H17 bearing lentiviral 283 pseudotypes:**

284 Monoclonal antibodies (mAbs) were serially diluted 1:2 across white 96-well Nunclon® plates  
285 (Thermo Fisher Scientific, UK) in 50 µl of DMEM. PV-containing supernatants were diluted and added  
286 to each well to give an approximate RLU value of  $1 \times 10^6$  per well in 50 µl of DMEM. After 1h  
287 incubation at 37°C and 5% CO<sub>2</sub>, approximately  $1 \times 10^4$  cells were added per well in a volume of 50µl.  
288 Plates were incubated for 48h at 37°C and 5% CO<sub>2</sub>, then 50 µl of Bright-Glo™ was added and  
289 luminescence read after a 5 minute incubation at room temperature. Results were analyzed with  
290 Graphpad (Prism 7), using nonlinear regression on luminescence values normalized to cell only and  
291 virus only control thresholds (100% and 0% neutralization equivalent, respectively). IC<sub>50</sub> values  
292 represent the concentration (ng/ml) required for each antibody to neutralize 50% of functional  
293 pseudotyped virus, based on luciferase activity.

#### 294 **Cell treatment**

295 Overnight treatment of RIE1495 cells with the endosomal acidification inhibitor  
296 ammonium chloride (SIGMA) and pretreatment for 2h with neuraminidase (Roche) was done as  
297 previously described (Maruyama et.al, 2016). Treated cells were washed three times with serum  
298 free medium, and then incubated for 24h with H17 PV. PV titration and luciferase activity was  
299 monitored with a luminometer as described previously.

### 300 Pseudotype based enzyme linked lectin assay (pELLA) utilizing N10:

301 ELLA was performed as described by Couzens et al. 2014, but adapted in order to allow use of  
302 lentiviral pseudotypes as a source of NA (Biuso et al. 2018; Prevato et al. 2015). Briefly, PV  
303 containing supernatant was serially diluted (1:2) across a standard clear microtitre plate in sample  
304 diluent (PBS, 1% BSA, 0.5% Tween 20). 50  $\mu$ l of the resulting dilution series was transferred in  
305 duplicate to Nunclon<sup>®</sup> Maxisorp 96-well plates (Thermo Fisher Scientific, UK) previously coated with  
306 Fetuin (Sigma Aldrich, UK) and containing 50  $\mu$ l of sample diluent per well. Plates were then  
307 incubated for 18h and washed, prior to addition of conjugate diluent (PBS, 1% BSA) containing a  
308 1:500 concentration of peanut lectin conjugated to horseradish peroxidase (PNA-HRPO, Sigma  
309 Aldrich, UK). Plates were then incubated for 2h in the dark, whereupon OPD-based substrate in  
310 citrate buffer was added (Sigma Aldrich, UK). Reactions were stopped after 10 minutes using 50  $\mu$ l  
311 1M H<sub>2</sub>SO<sub>4</sub>, and readings recorded using a standard ELISA plate reader at 492nm. Exogenous  
312 neuraminidase from *Clostridium perfringens* (Sigma Aldrich, UK) was used as a positive benchmark  
313 control and samples were assayed alongside PV bearing neuraminidases from other influenza  
314 subtypes.

### 315 Statistical analysis

316 Where possible, statistical analysis was carried out to determine whether differences in PV titre  
317 were significant. One-way ANOVA t-tests were performed using fold change scores with a Tukey's  
318 multiple comparisons test. P-values were set at 0.05 ( $P \leq 0.05$ ) unless indicated otherwise.  
319 Significantly different data are denoted with asteriks representing  $p = <0.01$  (\*),  $<0.001$  (\*\*),  $<0.0001$   
320 (\*\*\*) and  $<0.00001$  (\*\*\*\*).

321

322

323

## 324 Figures and Tables

325

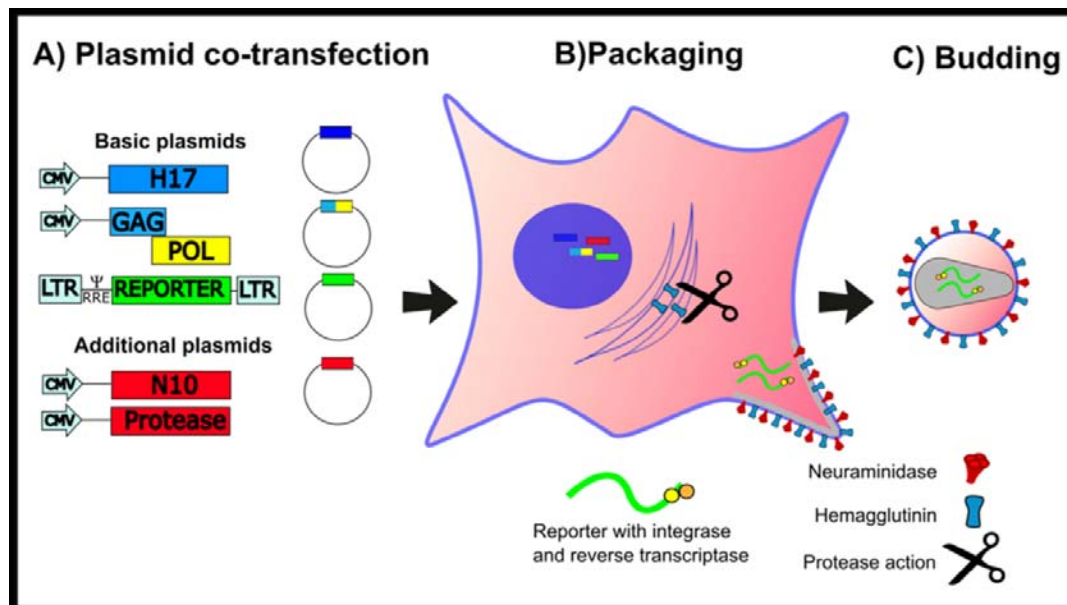

326



327 Figure 1. Cartoon showing the production of H17N10 PV via plasmid transfection.

328

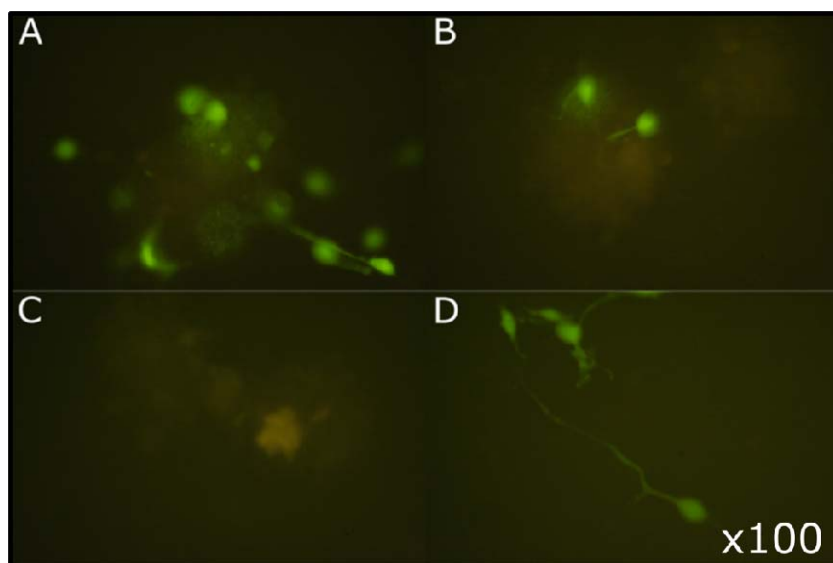

329

330 Figure 2. Transduction of U87 MG cells by influenza GFP PV (x100 magnification). A) H17 produced  
331 using pCAGGS-HAT. B) H17 PV produced using pCAGGS-TMPRSS2. C) Cell only control. D) H5 (A/Viet  
332 nam/1194/2004) PV positive control.

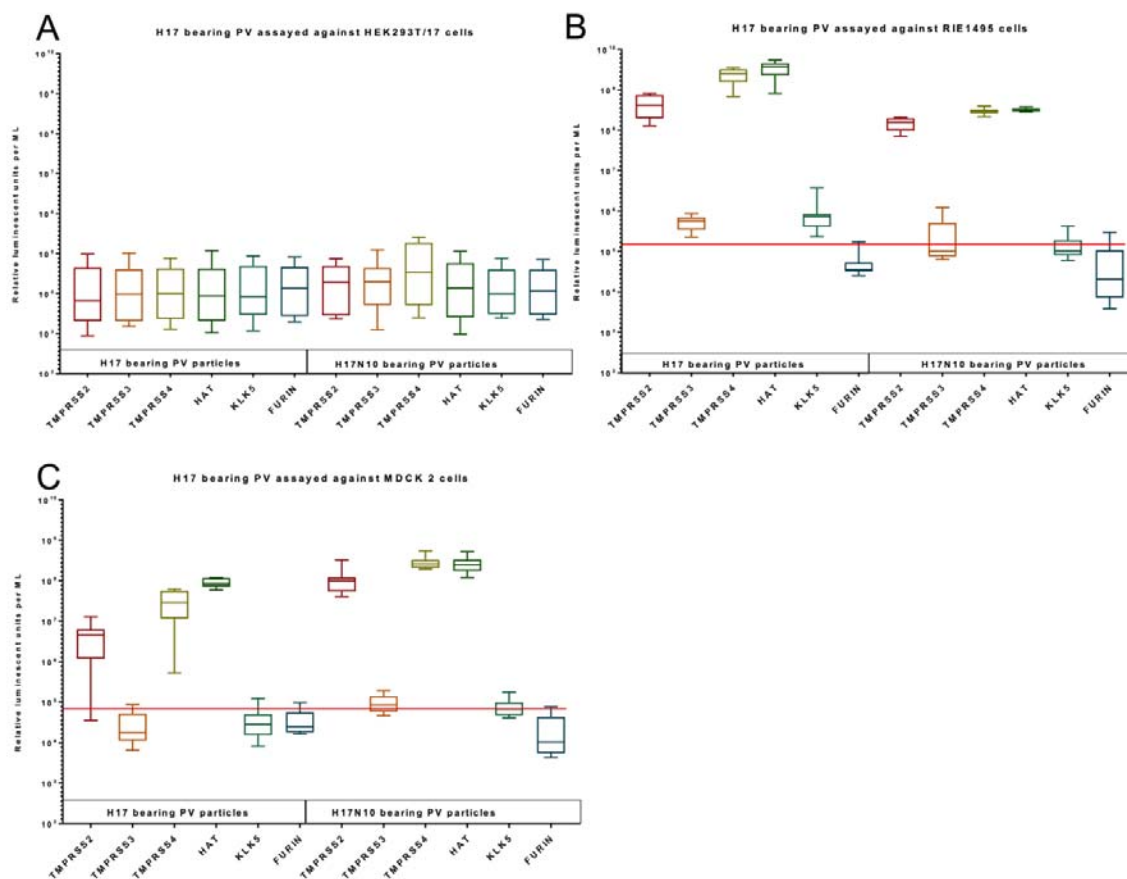

333

334 Figure 3. Transduction of various target cell lines. A) HEK293T/17, B) RIE1495 and C) MDCK II with  
335 H17 and H17N10 pseudotyped viruses carrying the luciferase reporter gene. Results given in Relative  
336 Luminescence Units per ml; RLU/ml). Average cell only luminescence shown as a red line.

337

338

339

340

341

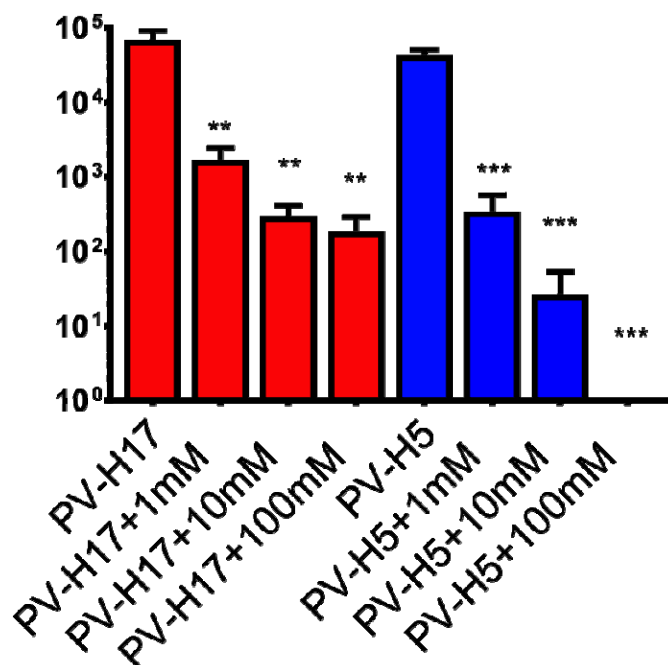

342

343

344 Figure 4. The effect of ammonium chloride based acidification on the transduction of RIE1495 cells  
345 by H17 PV. Increases in acidification of RIE1495 cell cultures prior to transduction by H17 resulted in  
346 lower luciferase based titres, indicating that the pH sensitivity of H17 is similar to that of H5.  
347 Significant differences in transduction denoted by asteriks, \*\* represents  $p = <0.001$  and \*\*\*  $p =$   
348  $<0.0001$  respectively.

349

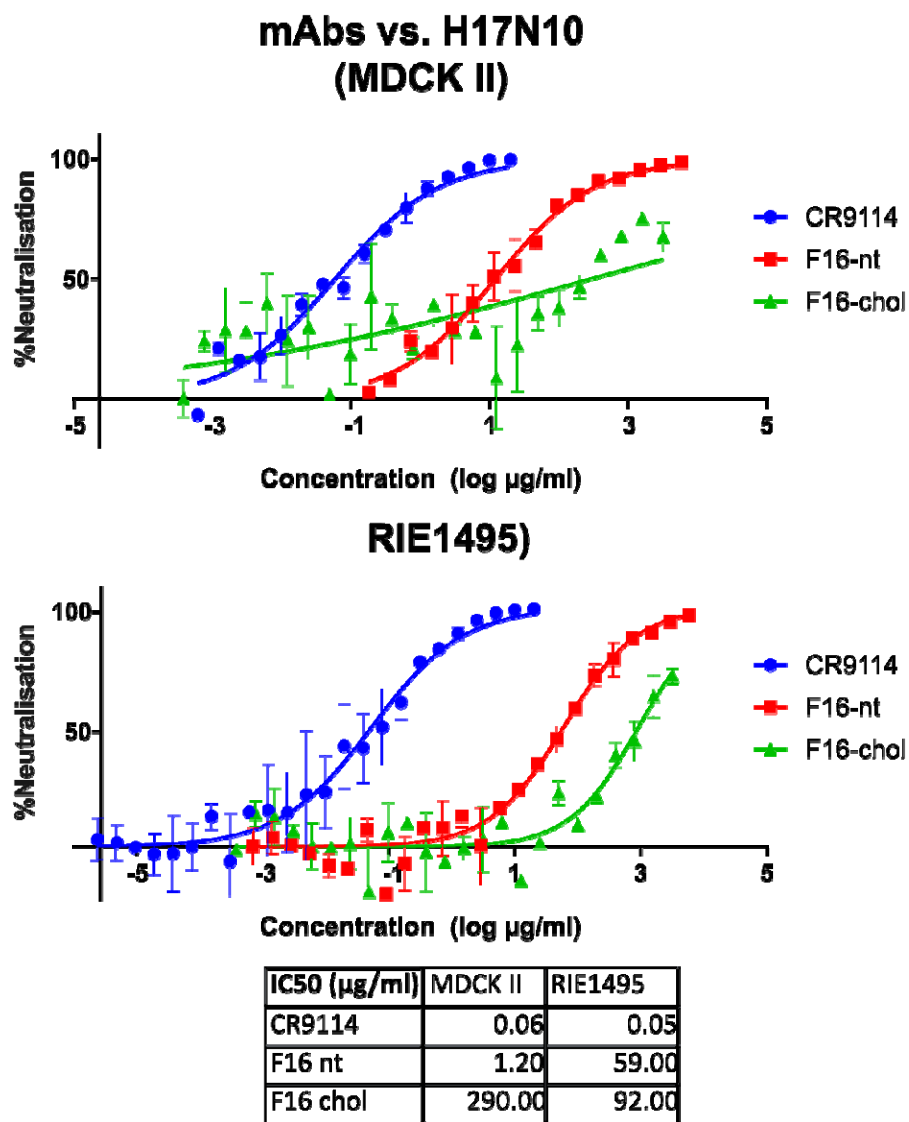

350

351

352 Figure 5. Neutralization curves and IC<sub>50</sub> values for mAbs CR9114, F16-nt and F16-Chol against  
353 H17N10 bearing lentiviral pseudotypes on cell lines RIE1495 and MDCK II. Nonlinear regression  
354 carried out using Graphpad (Prism 7) in order to provide IC<sub>50</sub> values for each graph. Each IC<sub>50</sub> is the  
355 concentration of mAb required for reduction of 50% of the virus input in terms of luciferase activity.

356

357

358

359

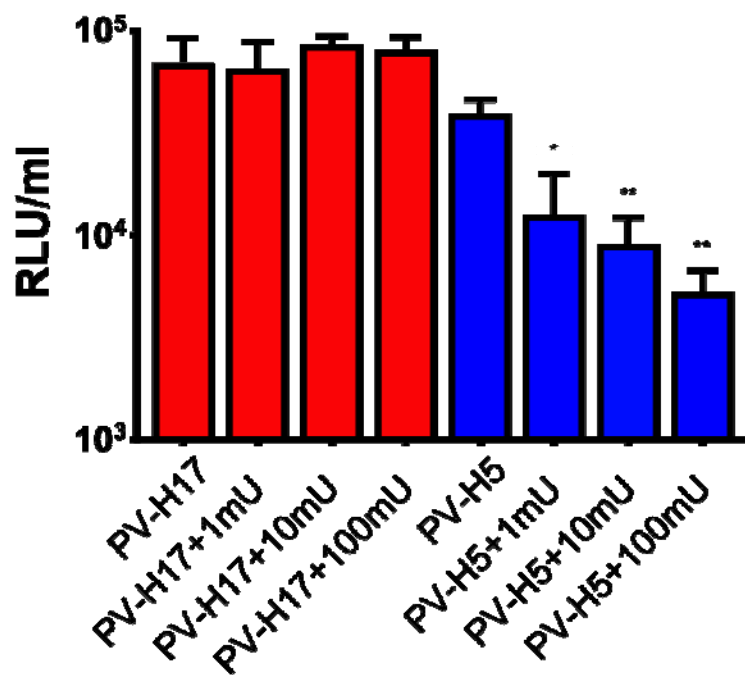

360

361

362 Figure 6. The effect of neuraminidase pre-treatment on the transduction of RIE1495 cells by H17 and  
363 H5 PV. No relationship is seen between pre-treatment of cells with neuraminidase for H17 bearing  
364 PV, but H5-based transduction is significantly reduced when sialic acids are stripped from target  
365 cells. Significant difference in transduction denoted by asteriks, \* represents  $p = <0.01$  and \*\*  $p =$   
366  $<0.001$  respectively.

367

368

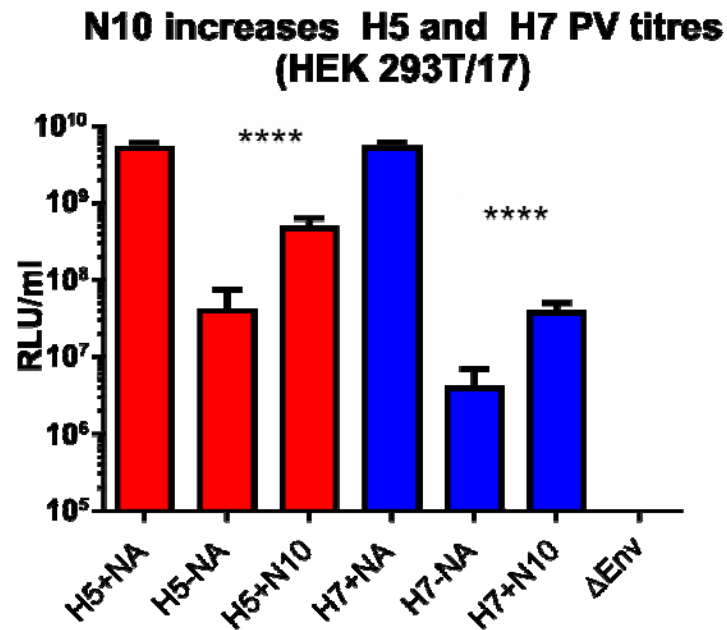

369

370

371

372 Figure 7. Release of H5 and H7 bearing PV by N10. PV bearing the glycoproteins H5  
373 (A/Vietnam/1194/2004) and H7 (A/Shanghai/1/2013) were produced with exogenous  
374 neuraminidase (+NA), with no NA (-NA) or accompanied with an N10 glycoprotein (+N10). H5 and  
375 H7 PVs produced in the presence of N10 have significantly higher luciferase titres than those  
376 produced with no NA. Background luciferase titre control ( $\Delta$  Env) control shown. Significant  
377 differences in transduction denoted by asteriks, \*\*\*\* represents  $p < 0.00001$ .

378

Table 1. Cell lines used in the production of Bat influenza VSV pseudotypes.

| Cell Line               | Species                                | Tissue:        |
|-------------------------|----------------------------------------|----------------|
| <i>Vero E6</i>          | <i>Chlorocebus sp.</i>                 | Kidney         |
| <i>HEK293</i>           | <i>Homo sapiens</i>                    | Kidney         |
| <b>MDCK</b>             | <b><i>Canis lupus familiaris</i></b>   | <b>Kidney</b>  |
| <i>SK-L</i>             | <i>Sus scrofa</i>                      | Kidney         |
| <i>QT6</i>              | <i>Coturnix japonica</i>               | Muscle         |
| <b>Cell Line:</b>       | <b>Bat species:</b>                    | <b>Tissue:</b> |
| <i>BKT1</i>             | <i>Rhinolophus ferrumequinum</i>       | Kidney         |
| <i>FBKT1</i>            | <i>Pteropus dasymallus yayeyamae</i>   | Kidney         |
| <b><i>YubFKT1</i></b>   | <b><i>Miniopterus fuliginosus</i></b>  | <b>Kidney</b>  |
| <b><i>IndFSPT1</i></b>  | <b><i>Pteropus giganteus</i></b>       | <b>Spleen</b>  |
| <i>DemKT1</i>           | <i>Rousettus leschenaultii</i>         | Kidney         |
| <i>ZFBK11-97</i>        | <i>Epomophorus gambianus</i>           | Kidney         |
| <b><i>SuBK12-08</i></b> | <b><i>Miniopterus schreibersii</i></b> | <b>Kidney</b>  |
| <i>ZFBS13-75A</i>       | <i>Eidolon helvum</i>                  | Spleen         |

List of cell lines used in VSV based pseudotyping of H17 and H18 viruses. Bold entries are those cell lines which were found to be permissive for viral transduction by Maruyama et al. 2016.

379

380

Table 2: MDCK cell lines.

|                                                  |
|--------------------------------------------------|
| NBL-2 (ATCC® cat # CCL-34™)                      |
| MDCK I (EEACC cat # 00062106)                    |
| MDCK II (EEACC cat# 00062107)                    |
| MDCK.1 (ATCC® cat# CRL-2935™)                    |
| MDCK.2 (ATCC® cat# CRL- CRL-2936™)               |
| super dome (ATCC® cat# CRL-2286™)                |
| super tube (ATCC® cat# CRL-2285™)                |
| Different MDCK cell lines available commercially |

381

382

383

384

385

386

387

388

389 Table 3: Genes, plasmids and sources.

| Gene                                                    | Plasmid                  | Source                                   |
|---------------------------------------------------------|--------------------------|------------------------------------------|
| Transmembrane protease, serine 2                        | pCAGGS-TMPRSS2           | (Böttcher et al. 2006)                   |
| Transmembrane protease, serine 3                        | pcDNA3.1-hTMPRSS3        | (Bertram et al. 2010)                    |
| Transmembrane protease, serine 4                        | phCMV-Tag3 (TMPRSS4-myc) | (Jung et al. 2008)                       |
| Human Airway Trypsin                                    | pCAGGS-HAT               | (Böttcher et al. 2006)                   |
| Kallikrein-related peptidase 5                          | pl.18-KLK5               | Synthesised, Sigma                       |
| Furin                                                   | pFurin                   | Kind gift from H. D. Klenk               |
| H17 (A/little yellow shouldered bat/Guatamala/060/2010) | pl.18-H17                | Synthesised, Genscript                   |
| N10 (A/little yellow shouldered bat/Guatamala/060/2010) | pl.18-N10                | Synthesised, Genscript                   |
| H5 (A/Viet Nam/1194/2004)                               | pl.18-H5                 | (Temperton et al. 2007)                  |
| HIV-1 packaging plasmid                                 | pCMVΔR8.91 (p8.91)       | (Zufferey et al. 1997)                   |
| Lentiviral vector for expression of Firefly Luciferase  | pHR-SIN-SE (pCSFLW)      | (Demaison et al. 2002)                   |
| Vesicular Stomatitis Virus glycoprotein                 | pMD.G (VSV-G)            | Yasu Takeuchi, University College London |

390

#### 391 **Acknowledgements**

392 EG is supported by the Biotechnology and Biological Sciences Research Council  
393 (<http://www.bbsrc.ac.uk>) via Strategic LoLa grant BB/K002465/1 “Developing Rapid Responses to  
394 Emerging Virus Infections of Poultry (DRREVIP)”.

395

396



397 **References**

- 398 Agnarsson, I., Zambrana-Torrel, C. M., Flores-Saldana, N. P., & May-Collado, L. J. (2011). A time-  
399 calibrated species-level phylogeny of bats (chiroptera, Mammalia). *PLoS Currents*, 3, RRN1212.  
400 doi:10.1371/currents.RRN1212
- 401 Barman, S., Adhikary, L., Chakrabarti, A. K., Bernas, C., Kawaoka, Y., Nayak, D. P., et al. (2004). Role of  
402 transmembrane domain and cytoplasmic tail amino acid sequences of influenza A virus  
403 neuraminidase in raft association and virus budding. *Journal of virology*, 78(10), 5258–5269.  
404 doi:10.1128/JVI.78.10.5258
- 405 Bertram, S., Glowacka, I., Blazejewska, P., Soilleux, E. J., Allen, P., Danisch, S., et al. (2010). Tmprss2  
406 and Tmprss4 facilitate trypsin-independent spread of influenza virus in Caco-2 cells. *J Virol*,  
407 84(19), 10016–10025. doi:10.1128/JVI.00239-10
- 408 Biuso, F., Carnell, G. W., Montomoli, E., & Temperton, N. (2018). A Lentiviral Pseudotype ELLA for  
409 the Measurement of Antibodies Against Influenza Neuraminidase. *Bio-Protocol*, 8(14), 1–15.  
410 doi:10.21769/BioProtoc.2936
- 411 Böttcher-Friebertshäuser, E., Freuer, C., Sielaff, F., Schmidt, S., Eickmann, M., Uhlenhorff, J., et al.  
412 (2010). Cleavage of influenza virus hemagglutinin by airway proteases Tmprss2 and HAT  
413 differs in subcellular localization and susceptibility to protease inhibitors. *Journal of virology*,  
414 84(11), 5605–14. doi:10.1128/JVI.00140-10
- 415 Böttcher, E., Matrosovich, T. Y., Beyerle, M., Klenk, H.-D., Garten, W., & Matrosovich, M. N. (2006).  
416 Proteolytic activation of influenza viruses by serine proteases Tmprss2 and HAT from human  
417 airway epithelium. *Journal of virology*, 80(19), 9896–8. doi:10.1128/JVI.01118-06
- 418 Corti, D., Voss, J., Gambelin, S. J., Codoni, G., Macagno, A., Jarrossay, D., et al. (2011). A Neutralizing  
419 Antibody Selected from Plasma Cells That Binds to Group 1 and Group 2 Influenza A  
420 Hemagglutinins. *Science*, 333(6044), 850–6. doi:10.1126/science.1205669
- 421 Couzens, L., Gao, J., Westgeest, K. B., Sandbulte, M. R., Lugovtsev, V. Y., Fouchier, R. A. M., &  
422 Eichelberger, M. C. (2014). An optimized enzyme-linked lectin assay to measure influenza A  
423 virus neuraminidase inhibition antibody titers in human sera. *Journal of Virological Methods*,  
424 210, 7–14. doi:10.1016/j.jviromet.2014.09.003
- 425 Cox, R. J., Mykkeltvedt, E., Robertson, J. S., & Haaheim, L. R. (2002). Non-lethal viral challenge of  
426 influenza haemagglutinin and nucleoprotein DNA vaccinated mice results in reduced viral  
427 replication. *Scandinavian Journal of Immunology*, 55(1), 14–23. doi:10.1046/j.1365-  
428 3083.2002.01015.x
- 429 Demaison, C., Parsley, K., Brouns, G., Scherr, M., Battmer, K., Kinnon, C., et al. (2002). High-level  
430 transduction and gene expression in hematopoietic repopulating cells using a human  
431 immunodeficiency [correction of immunodeficiency] virus type 1-based lentiviral vector  
432 containing an internal spleen focus forming virus promoter. *Human gene therapy*, 13(7), 803–  
433 813. doi:10.1089/10430340252898984
- 434 Dos Reis, M., Tamuri, A. U., Hay, A. J., & Goldstein, R. A. (2011). Charting the host adaptation of  
435 influenza viruses. *Molecular Biology and Evolution*, 28(6), 1755–1767.  
436 doi:10.1093/molbev/msq317
- 437 Dreyfus, C., Ekiert, D. C., & Wilson, I. A. (2013). Structure of a Classical Broadly Neutralizing Stem  
438 Antibody in Complex with a Pandemic H2 Influenza Virus Hemagglutinin. *Journal of Virology*,  
439 87(12), 7149–7154. doi:10.1128/JVI.02975-12

- 440 Dreyfus, C., Laursen, N. S., Kwaks, T., Zuijdggeest, D., Khayat, R., Ekiert, D. C., et al. (2012). Highly  
441 Conserved Protective Epitopes on Influenza B Viruses. *Science*, 337(6100), 1343–1348.  
442 doi:10.1126/science.1222908
- 443 Dukes, J. D., Whitley, P., Chalmers, A. D., Gaush, C., Hard, W., Smith, T., et al. (2011). The MDCK  
444 variety pack: choosing the right strain. *BMC Cell Biology*, 12(1), 43. doi:10.1186/1471-2121-12-  
445 43
- 446 Ebrahimi, M., Aghagolzadeh, P., Shamabadi, N., Tahmasebi, A., Alsharifi, M., Adelson, D. L., et al.  
447 (2014). Understanding the undelaying mechanism of HASubtyping in the level of physic-  
448 chemical characteristics of protein. *PLoS ONE*, 9(5), 1–14. doi:10.1371/journal.pone.0096984
- 449 Ekiert, D. C., Bhabha, G., Elsliger, M., Friesen, R. H. E., Jongeneelen, M., Throsby, M., et al. (2009).  
450 Antibody recognition of a highly conserved influenza virus epitope: implications for universal  
451 prevention and therapy. *Science*, 324(5924), 246–251. doi:10.1126/science.1171491.Antibody
- 452 Ferrara, F., Molesti, E., Böttcher-Friebertshäuser, E., Cattoli, G., Corti, D., Scott, S. D., & Temperton,  
453 N. J. (2012). The human Transmembrane Protease Serine 2 is necessary for the production of  
454 Group 2 influenza A virus pseudotypes. *Journal of molecular and genetic medicine: an  
455 international journal of biomedical research*, 7, 309–14.
- 456 Freidl, G. S., Binger, T., Müller, M. A., De Bruin, E., Van Beek, J., Corman, V. M., et al. (2015).  
457 Serological evidence of influenza a viruses in frugivorous bats from Africa. *PLoS ONE*, 10(5), 1–  
458 7. doi:10.1371/journal.pone.0127035
- 459 Friesen, R. H. E., Koudstaal, W., Koldijk, M. H., Weverling, G. J., Brakenhoff, J. P. J., Lenting, P. J., et al.  
460 (2010). New class of monoclonal antibodies against severe influenza: Prophylactic and  
461 therapeutic efficacy in ferrets. *PLoS ONE*, 5(2), 1–7. doi:10.1371/journal.pone.0009106
- 462 García-Sastre, A. (2012). The neuraminidase of bat influenza viruses is not a neuraminidase. *Proc  
463 Natl Acad Sci U S A*, 109(46), 18635–18636. doi:10.1073/pnas.1215857109
- 464 Gelfond, J. A. L., Gupta, M., & Ibrahim, J. G. (2009). A bayesian hidden markov model for motif  
465 discovery through joint modeling of genomic sequence and ChIP-chip data. *Biometrics*, 65(4),  
466 1087–1095. doi:10.1111/j.1541-0420.2008.01180.x
- 467 Hansson, G. C., Simons, K., & Meer, G. Van. (1986). Two strains of the Madin- Darby canine kidney (   
468 NDCK ) cell line have distinct glycosphingolipid compositions. *Proceedings of the National  
469 Academy of Sciences*, 5(3), 483–489.
- 470 Hoffmann, M., Krüger, N., Zmora, P., Wrensch, F., Herrler, G., & Pöhlmann, S. (2016). The  
471 hemagglutinin of bat-associated influenza viruses is activated by TMPRSS2 for pH-dependent  
472 entry into bat but not human cells. *PLoS ONE*, 11(3), 1–18. doi:10.1371/journal.pone.0152134
- 473 Jung, H., Lee, K. P., Park, S. J., Park, J. H., Jang, Y. S., Choi, S. Y., et al. (2008). TMPRSS4 promotes  
474 invasion, migration and metastasis of human tumor cells by facilitating an epithelial-  
475 mesenchymal transition. *Oncogene*, 27(18), 2635–2647. doi:10.1038/sj.onc.1210914
- 476 Juozapaitis, M., Aguiar Moreira, E., Mena, I., Giese, S., Riegger, D., Pohlmann, A., et al. (2014). An  
477 infectious bat-derived chimeric influenza virus harbouring the entry machinery of an influenza  
478 A virus. *Nat Commun*, 5, 4448. doi:10.1038/ncomms5448
- 479 Kandeil, A., Gomaa, M. R., Shehata, M. M., El Taweel, A. N., Mahmoud, S. H., Bagato, O., et al.  
480 (2018). Isolation and characterization of a distinct influenza A virus from Egyptian bats. *Journal  
481 of virology*, JVI.01059-18. doi:10.1128/JVI.01059-18
- 482 Lacek, K., Urbanowicz, R. A., Troise, F., De Lorenzo, C., Severino, V., Di Maro, A., et al. (2014).

- 483 Dramatic potentiation of the antiviral activity of HIV antibodies by cholesterol conjugation.  
484 *Journal of Biological Chemistry*, 289(50), 35015–35028. doi:10.1074/jbc.M114.591826
- 485 Li, Q., Sun, X., Li, Z., Liu, Y., Vavricka, C. J., Qi, J., & Gao, G. F. (2012). Structural and functional  
486 characterization of neuraminidase-like molecule N10 derived from bat influenza A virus.  
487 *Proceedings of the National Academy of Sciences of the United States of America*, 109(46),  
488 18897–18902. doi:10.1073/pnas.1211037109
- 489 Ma, W., García-Sastre, A., & Schwemmler, M. (2015). Expected and Unexpected Features of the  
490 Newly Discovered Bat Influenza A-like Viruses. *PLoS Pathog*, 11(6), e1004819.  
491 doi:10.1371/journal.ppat.1004819
- 492 Ma, W., Lager, K. M., Vincent, A. L., Janke, B. H., Gramer, M. R., & Richt, J. A. (2009). The role of  
493 swine in the generation of novel influenza viruses. *Zoonoses and Public Health*, 56(6–7), 326–  
494 337. doi:10.1111/j.1863-2378.2008.01217.x
- 495 Maeda, K., Hondo, E., Terakawa, J., Kiso, Y., Nakaichi, N., Endoh, D., et al. (2008). Isolation of novel  
496 adenovirus from fruit bat (*Pteropus dasymallus yayeyamae*) [7]. *Emerging Infectious Diseases*,  
497 14(2), 347–349. doi:10.3201/eid1402.070932
- 498 Mänz, B., Schwemmler, M., & Brunotte, L. (2013). Adaptation of avian influenza A virus polymerase in  
499 mammals to overcome the host species barrier. *Journal of virology*, 87(April), 7200–9.  
500 doi:10.1128/JVI.00980-13
- 501 Maruyama, J., Miyamoto, H., Kajihara, M., Ogawa, H., Maeda, K., Sakoda, Y., et al. (2014).  
502 Characterization of the Envelope Glycoprotein of a Novel Filovirus, Lloviu Virus. *Journal of*  
503 *Virology*, 88(1), 99–109. doi:10.1128/JVI.02265-13
- 504 Maruyama, J., Nao, N., Miyamoto, H., Maeda, K., Ogawa, H., Yoshida, R., et al. (2016).  
505 Characterization of the glycoproteins of bat-derived influenza viruses. *Virology*, 488, 43–50.  
506 doi:10.1016/j.virol.2015.11.002
- 507 Millet, J. K., & Whittaker, G. R. (2015). Host cell proteases: Critical determinants of coronavirus  
508 tropism and pathogenesis. *Virus research*, 202, 120–34. doi:10.1016/j.virusres.2014.11.021
- 509 Moreira, É. A., Locher, S., Kolesnikova, L., Bolte, H., Aydillo, T., García-Sastre, A., et al. (2016).  
510 Synthetically derived bat influenza A-like viruses reveal a cell type- but not species-specific  
511 tropism. *Proceedings of the National Academy of Sciences*, 201608821.  
512 doi:10.1073/pnas.1608821113
- 513 Otterstrom, J. J., Brandenburg, B., Koldijk, M. H., Juraszek, J., Tang, C., Mashaghi, S., et al. (2014).  
514 Relating influenza virus membrane fusion kinetics to stoichiometry of neutralizing antibodies at  
515 the single-particle level. *Proceedings of the National Academy of Sciences*, 111(48), E5143–  
516 E5148. doi:10.1073/pnas.1411755111
- 517 Prevato, M., Cozzi, R., Pezzicoli, A., Taddei, A. R., Ferlenghi, I., Nandi, A., et al. (2015). An innovative  
518 pseudotypes-based Enzyme-Linked Lectin Assay for the measurement of functional anti-  
519 neuraminidase antibodies. *PLoS ONE*, 10(8), e0135383. doi:10.1371/journal.pone.0135383
- 520 Reperant, L. A., Kuiken, T., & Osterhaus, A. D. (2012). Adaptive pathways of zoonotic influenza  
521 viruses: From exposure to establishment in humans. *Vaccine*, 30(30), 4419–4434.  
522 doi:10.1016/j.vaccine.2012.04.049
- 523 Sahini, L., Tempczyk-Russell, A., & Agarwal, R. (2010). Large-scale sequence analysis of hemagglutinin  
524 of influenza A virus identifies conserved regions suitable for targeting an anti-viral response.  
525 *PLoS ONE*, 5(2), 1–9. doi:10.1371/journal.pone.0009268

- 526 Sui, J., Hwang, W. C., Perez, S., Wei, G., Aird, D., Chen, L., et al. (2009). Structural and functional  
527 bases for broad-spectrum neutralization of avian and human influenza A viruses. *Nature*  
528 *structural & molecular biology*, 16(3), 265–273. doi:10.1038/nsmb.1566
- 529 Sun, X., Shi, Y., Lu, X., He, J., Gao, F., Yan, J., et al. (2013). Bat-Derived Influenza Hemagglutinin H17  
530 Does Not Bind Canonical Avian or Human Receptors and Most Likely Uses a Unique Entry  
531 Mechanism. *Cell Reports*, 3(3), 769–778. doi:10.1016/j.celrep.2013.01.025
- 532 Temperton, N. J., Hoschler, K., Major, D., Nicolson, C., Manvell, R., Hien, V. M., et al. (2007). A  
533 sensitive retroviral pseudotype assay for influenza H5N1-neutralizing antibodies. *Influenza and*  
534 *other respiratory viruses*, 1(3), 105–112. doi:10.1111/j.1750-2659.2007.00016.x
- 535 Tong, S., Li, Y., Rivallier, P., Conrardy, C., Castillo, D. A. A., Chen, L.-M., et al. (2012). A distinct lineage  
536 of influenza A virus from bats. *Proceedings of the National Academy of Sciences of the United*  
537 *States of America*, 109(11), 4269–4274. doi:10.1073/pnas.1116200109
- 538 Tong, S., Zhu, X., Li, Y., Shi, M., Zhang, J., Bourgeois, M., et al. (2013). New World Bats Harbor Diverse  
539 Influenza A Viruses. *PLoS Pathogens*, 9(10). doi:10.1371/journal.ppat.1003657
- 540 Webster, R. G., Bean, W. J., Gorman, O. T., Chambers, T. M., & Kawaoka, Y. (1992). *Evolution and*  
541 *Ecology of Influenza A Viruses. MICROBIOLOGICAL REVIEWS* (Vol. 56).  
542 <https://www.ncbi.nlm.nih.gov/pmc/articles/PMC372859/pdf/microrev00028-0170.pdf>.  
543 Accessed 27 August 2018
- 544 Wilson, I. a, & Cox, N. J. (1990). Structural basis of immune recognition of influenza virus  
545 hemagglutinin. *Annual review of immunology*, 8(1), 737–771.  
546 doi:10.1146/annurev.iy.08.040190.003513
- 547 Wu, Y., Wu, Y., Tefsen, B., Shi, Y., & Gao, G. F. (2014). Bat-derived influenza-like viruses H17N10 and  
548 H18N11. *Trends in Microbiology*, 22(4), 183–191. doi:10.1016/j.tim.2014.01.010
- 549 Yondola, M. A., Fernandes, F., Belicha-Villanueva, A., Uccellini, M., Gao, Q., Carter, C., & Palese, P.  
550 (2011). Budding capability of the influenza virus neuraminidase can be modulated by tetherin.  
551 *Journal of virology*, 85(6), 2480–91. doi:10.1128/JVI.02188-10
- 552 Zhou, B., Ma, J., Liu, Q., Bawa, B., Wang, W., Shabman, R. S., et al. (2014). Characterization of  
553 Uncultivable Bat Influenza Virus Using a Replicative Synthetic Virus. *PLoS Pathogens*, 10(10),  
554 e1004420. doi:10.1371/journal.ppat.1004420
- 555 Zhu, X., Yang, H., Guo, Z., Yu, W., Carney, P. J., Li, Y., et al. (2012). Crystal structures of two subtype  
556 N10 neuraminidase-like proteins from bat influenza A viruses reveal a diverged putative active  
557 site. *Proceedings of the National Academy of Sciences of the United States of America*, 109(46),  
558 18903–18908. doi:10.1073/pnas.1212579109
- 559 Zimmer, G., Lottspeich, F., Maisner, A., Klenk, H. D., & Herrler, G. (1997). Molecular characterization  
560 of gp40, a mucin-type glycoprotein from the apical plasma membrane of Madin-Darby canine  
561 kidney cells (type I). *The Biochemical journal*, 326, 99–108. doi:10.1042/bj3260099
- 562 Zufferey, R., Nagy, D., Mandel, R. J., Naldini, L., & Trono, D. (1997). Multiply attenuated lentiviral  
563 vector achieves efficient gene delivery in vivo. *Nat Biotechnol*, 15(9), 871–875.  
564 doi:10.1038/nbt0997-871
- 565
